# Supplementary material for: Optimal configurations for stiffness and compliance in human & robot arms
Source: PubMed Central journal article supplement (PMC11135727; doi:10.1371/journal.pone.0302987), 2024-05-29
Supplement: pone.0302987.s001.pdf [file pone.0302987.s001.pdf]

**S1 Appendix. Proof of Inequality between the Active and Passive Stiffness Matrices** Assume from Eq 27 that we can write:

$$\mathbf{K}_a = -\mathbf{K}_p \quad (53a)$$

$$\mathbf{J}^T \mathbf{K}_c \mathbf{J} = -\frac{\partial \mathbf{J}^T}{\partial \mathbf{q}} \mathbf{w}. \quad (53b)$$

However it can be shown through proof by contradiction that this equality is impossible. First consider that the work done on the endpoint is:

$$W = \frac{1}{2} \delta \mathbf{x}^T \mathbf{K}_c \delta \mathbf{x} = \frac{1}{2} \delta \mathbf{q}^T \mathbf{J}^T \mathbf{K}_c \mathbf{J} \delta \mathbf{q} \geq 0 \quad \forall \delta \mathbf{q} \quad (54)$$

where the relationship  $\delta \mathbf{x} = \mathbf{J} \delta \mathbf{q}$  has been used Eq 3. Under this condition  $\mathbf{J}^T \mathbf{K}_c \mathbf{J}$  is at least positive semi-definite. It follows from Eq 53b that  $\frac{\partial \mathbf{J}^T}{\partial \mathbf{q}} \mathbf{w}$  is negative semi-definite and, by extension, symmetric. Expanding this matrix we have:

$$\frac{\partial \mathbf{J}^T}{\partial \mathbf{q}} \mathbf{w} = \begin{bmatrix} \frac{\partial \mathbf{J}_1^T}{\partial q_1} \mathbf{w} & \dots & \frac{\partial \mathbf{J}_1^T}{\partial q_n} \mathbf{w} \\ \vdots & \ddots & \vdots \\ \frac{\partial \mathbf{J}_n^T}{\partial q_1} \mathbf{w} & \dots & \frac{\partial \mathbf{J}_n^T}{\partial q_n} \mathbf{w} \end{bmatrix} \in \mathbb{R}^{n \times n} \quad (55)$$

Then from symmetry it must be that:

$$\frac{\partial \mathbf{J}_i^T}{\partial q_j} \mathbf{w} = \mathbf{w}^T \frac{\partial \mathbf{J}_j}{\partial q_i} \quad (56a)$$

$$\frac{\partial \mathbf{J}_i}{\partial q_j} = \frac{\partial \mathbf{J}_j}{\partial q_i}. \quad (56b)$$

But we know that this is not true Eq 11. Thus,  $\frac{\partial \mathbf{J}^T}{\partial \mathbf{q}} \mathbf{w}$  is not symmetric and  $\mathbf{K}_a = -\mathbf{K}_p$  cannot be a solution to Eq 27. ■
